# Supplementary material for: IoT in urban development: insight into smart city applications, case studies, challenges, and future prospects
Source: PeerJ Comput Sci. 2025 Apr 29;11:e2816. doi: 10.7717/peerj-cs.2816 (PMC12190393; doi:10.7717/peerj-cs.2816)
Supplement: Supplemental Information 1 [file peerj-cs-11-2816-s001.xlsx]

## Sheet: Sheet1
Smart City	IoT Implementations	Key Metrics & Data
Masdar City (UAE)	Renewable energy-based smart city with IoT-driven transportation, energy, and urban planning	100% renewable energy target by 2030, $22 billion investment in infrastructure, 60% reduction in water consumption through smart meters
New York (USA)	IoT applications in transportation, water management, and open data initiatives	10,000+ IoT sensors deployed, 300,000 employees using Open Data, 15% reduction in water consumption with automated meters
Copenhagen (Denmark)	IoT-driven transportation and energy efficiency solutions	42% of daily commutes via bicycles with IoT tracking, Carbon-neutral target by 2025, Seawater-based cooling reducing energy consumption by 30%
Singapore	IoT-powered urban planning, transportation, and smart utilities	100% coverage of smart water meters, 15% reduction in energy consumption from smart grid integration, Real-time IoT-based public transport tracking
Fujisawa (Japan)	IoT-enabled smart homes and energy-efficient urban management	190,000 m² smart housing project with automated energy-sharing, 100% renewable energy reliance, E-waste IoT management system reducing landfill waste by 50%
